# Supplementary material for: Global burden of aortic aneurysm in adults aged 60 and older from 1990 to 2021 and projections to 2040: based on the Global Burden of Disease Study 2021
Source: Research Square preprint supplement (doi:10.21203/rs.3.rs-7393211/v1), 2025-10-01
Supplement: Supplementary file 1 [file 05bc0d35d9d6d1477b02a4f0.xlsx]

## Sheet: Sheet1
The deaths and ASMR in the elderly AA across 204 countries between 1990 and 2021
Location	1990		2021		1990-2021
	Deaths cases (95% UI)	ASMR per 100,000 (95% UI)	Deaths cases (95% UI)	ASMR per 100,000 (95% UI)	EAPC in ASMR (95% CI)
Afghanistan	3.72(1.85 to 6.65)	0.5(0.25 to 0.89)	14.05(8.06 to 22.38)	1.74(0.99 to 2.8)	4.80(4.50 to 5.10)
Albania	13.39(9.93 to 17.65)	6.25(4.62 to 8.26)	41.05(24.59 to 62.95)	7.34(4.41 to 11.21)	0.71(0.57 to 0.86)
Algeria	10.64(6.48 to 16.43)	1.01(0.60 to 1.57)	89.34(56.21 to 136.36)	2.65(1.61 to 4.07)	4.15(3.74 to 4.56)
American Samoa	0.44(0.30 to 0.61)	25.49(17.27 to 36.86)	0.79(0.54 to 1.12)	17.66(11.96 to 25.21)	-1.51(-1.67 to -1.35)
Andorra	3.28(1.83 to 5.57)	49.71(27.43 to 85.03)	5.95(3.35 to 9.91)	28.80(16.14 to 48.07)	-1.72(-1.95 to -1.49)
Angola	57.34(29.39 to 95.85)	17.65(9.19 to 29.41)	191.08(103.82 to 319.98)	19.69(10.65 to 32.98)	0.20(0.11 to 0.29)
Antigua and Barbuda	1.56(1.32 to 1.83)	20.92(17.73 to 24.59)	1.69(1.41 to 2.04)	14.20(11.91 to 17.09)	-1.85(-2.16 to -1.55)
Argentina	1380.37(1171.01 to 1607.96)	34.83(29.51 to 40.53)	1319.40(1109.13 to 1541.05)	17.86(15.02 to 20.87)	-2.25(-2.47 to -2.04)
Armenia	82.58(65.76 to 104.24)	27.82(22.08 to 35.26)	345.23(283.20 to 412.05)	61.56(50.49 to 73.53)	2.88(2.54 to 3.23)
Australia	1393.05(1204.81 to 1584.70)	55.75(48.03 to 63.39)	1114.48(919.41 to 1283.36)	16.89(13.98 to 19.46)	-4.36(-4.54 to -4.19)
Austria	357.45(309.04 to 406.75)	21.97(18.95 to 25.01)	338.64(277.85 to 393.21)	12.79(10.58 to 14.83)	-2.04(-2.21 to -1.86)
Azerbaijan	22.57(15.23 to 32.52)	4.31(2.88 to 6.25)	90.01(53.95 to 142.33)	8.53(5.26 to 13.11)	2.90(2.56 to 3.23)
Bahamas	4.28(3.60 to 5.08)	25.45(21.37 to 30.18)	8.41(6.71 to 10.35)	19.58(15.66 to 24.03)	-1.05(-1.41 to -0.69)
Bahrain	0.58(0.41 to 0.83)	4.19(2.97 to 5.92)	3.05(1.97 to 4.67)	4.77(3.19 to 7.07)	0.59(0.14 to 1.04)
Bangladesh	266.53(134.84 to 519.67)	5.63(2.88 to 10.88)	1227.50(698.41 to 2168.55)	8.49(4.82 to 14.93)	1.33(1.15 to 1.51)
Barbados	8.45(7.21 to 9.85)	20.43(17.43 to 23.75)	10.71(8.26 to 13.55)	15.92(12.30 to 20.11)	-1.46(-1.78 to -1.15)
Belarus	237.99(193.45 to 296.98)	14.77(11.97 to 18.41)	453.03(358.70 to 561.70)	21.12(16.73 to 26.16)	0.88(0.60 to 1.16)
Belgium	757.64(642.07 to 875.28)	36.43(30.81 to 42.11)	570.48(458.75 to 667.95)	16.06(13.05 to 18.80)	-2.90(-3.07 to -2.73)
Belize	0.79(0.65 to 0.98)	7.02(5.77 to 8.64)	1.92(1.57 to 2.29)	6.20(5.06 to 7.38)	-1.07(-1.79 to -0.34)
Benin	23.43(10.24 to 44.92)	10.92(4.77 to 21.04)	52.92(20.31 to 105.34)	10.99(4.22 to 21.86)	-0.15(-0.24 to -0.05)
Bermuda	6.13(5.29 to 7.05)	84.63(72.96 to 97.35)	5.94(4.72 to 7.40)	30.31(24.09 to 37.81)	-3.45(-3.60 to -3.30)
Bhutan	1.09(0.62 to 1.77)	5.41(3.07 to 8.80)	7.07(4.02 to 11.66)	10.50(5.97 to 17.32)	2.38(2.31 to 2.45)
Bolivia (Plurinational State of)	25.78(14.50 to 40.96)	8.13(4.64 to 12.83)	87.37(54.08 to 134.04)	9.14(5.67 to 14.01)	0.47(0.43 to 0.51)
Bosnia and Herzegovina	57.57(39.04 to 82.24)	13.58(9.20 to 19.38)	165.97(111.34 to 233.89)	19.96(13.38 to 28.11)	1.47(1.35 to 1.60)
Botswana	8.07(4.52 to 13.84)	17.30(9.78 to 29.13)	18.79(10.84 to 28.82)	15.23(8.65 to 23.99)	-0.58(-0.76 to -0.41)
Brazil	1933.54(1784.88 to 2064.81)	20.44(18.69 to 21.89)	7865.99(6951.92 to 8558.52)	25.84(22.77 to 28.13)	0.56(0.30 to 0.83)
Brunei Darussalam	3.73(2.14 to 6.04)	39.20(22.53 to 63.66)	9.32(6.62 to 12.86)	32.72(22.90 to 45.98)	-0.07(-0.25 to 0.12)
Bulgaria	157.57(135.44 to 181.36)	11.80(10.23 to 13.45)	298.65(238.03 to 372.11)	15.33(12.24 to 19.07)	0.86(0.58 to 1.13)
Burkina Faso	49.45(23.38 to 105.63)	11.85(5.59 to 25.43)	127.99(58.03 to 263.86)	14.44(6.60 to 29.81)	0.84(0.76 to 0.92)
Burundi	37.79(18.52 to 67.68)	15.95(7.84 to 28.74)	40.35(16.45 to 80.12)	9.80(3.98 to 19.61)	-2.08(-2.43 to -1.73)
Cabo Verde	3.87(1.37 to 8.45)	12.49(4.40 to 27.20)	8.25(3.72 to 15.74)	16.78(7.57 to 32.04)	0.44(0.11 to 0.77)
Cambodia	15.28(8.09 to 25.54)	3.82(1.97 to 6.42)	58.70(33.21 to 100.01)	5.22(2.87 to 8.97)	1.08(0.95 to 1.21)
Cameroon	68.17(38.58 to 125.70)	16.71(9.44 to 30.82)	177.34(97.05 to 310.51)	15.78(8.74 to 27.44)	-0.53(-0.68 to -0.39)
Canada	1989.12(1717.58 to 2281.30)	47.63(41.03 to 54.61)	1630.19(1338.54 to 1893.65)	15.61(12.87 to 18.14)	-4.25(-4.51 to -3.99)
Central African Republic	17.02(8.86 to 31.29)	17.87(9.35 to 32.97)	23.80(11.17 to 45.49)	14.23(6.66 to 27.18)	-0.92(-1.01 to -0.84)
Chad	29.31(12.73 to 64.36)	9.63(4.13 to 21.32)	54.11(21.14 to 115.41)	10.33(4.06 to 22.19)	0.01(-0.10 to 0.11)
Chile	204.14(177.21 to 233.98)	17.90(15.51 to 20.50)	474.52(397.24 to 550.36)	14.28(11.96 to 16.56)	-0.82(-1.13 to -0.51)
China	1379.70(1093.53 to 1748.28)	1.75(1.39 to 2.19)	5838.83(4575.99 to 7378.55)	2.36(1.85 to 2.98)	1.18(1.05 to 1.31)
Colombia	424.97(367.28 to 487.64)	22.62(19.51 to 25.93)	1371.56(1082.69 to 1689.74)	19.90(15.76 to 24.50)	-1.56(-1.95 to -1.16)
Comoros	2.86(1.10 to 5.52)	15.64(6.10 to 30.08)	6.37(2.26 to 12.70)	13.28(4.69 to 26.64)	-0.88(-1.07 to -0.70)
Congo	26.39(15.04 to 42.35)	26.45(14.89 to 42.40)	51.27(28.53 to 85.30)	22.90(12.65 to 38.45)	-0.75(-0.94 to -0.55)
Cook Islands	0.27(0.18 to 0.39)	23.07(15.18 to 33.68)	0.62(0.31 to 1.18)	19.49(9.83 to 37.04)	-0.72(-0.80 to -0.65)
Costa Rica	32.28(27.21 to 38.01)	15.99(13.47 to 18.82)	108.65(88.39 to 128.90)	15.82(12.91 to 18.75)	-0.45(-0.69 to -0.20)
Coted'Ivoire	54.41(23.62 to 103.01)	17.42(7.70 to 33.30)	155.50(63.95 to 303.19)	16.46(6.88 to 32.25)	-0.62(-0.78 to -0.45)
Croatia	121.08(104.09 to 141.17)	17.76(15.27 to 20.64)	288.83(240.64 to 336.54)	22.85(18.99 to 26.68)	0.75(0.51 to 0.99)
Cuba	520.36(450.27 to 597.77)	41.52(35.84 to 47.61)	708.60(585.51 to 842.16)	27.14(22.41 to 32.30)	-1.76(-1.94 to -1.57)
Cyprus	45.45(29.07 to 66.85)	57.88(35.82 to 86.43)	75.10(50.20 to 108.90)	29.09(19.28 to 42.33)	-2.70(-2.92 to -2.49)
Czechia	330.98(296.42 to 370.46)	18.46(16.51 to 20.65)	573.28(485.47 to 660.52)	19.00(16.05 to 21.94)	-0.11(-0.57 to 0.34)
Democratic People's Republic of Korea	40.96(25.33 to 61.96)	2.68(1.63 to 4.13)	94.63(59.64 to 144.33)	2.52(1.56 to 3.92)	0.07(-0.06 to 0.20)
Democratic Republic of the Congo	233.12(106.79 to 441.87)	17.43(7.83 to 33.24)	454.70(209.73 to 857.10)	14.66(6.75 to 27.75)	-0.72(-1.06 to -0.39)
Denmark	525.58(449.62 to 607.02)	46.71(39.95 to 53.96)	589.77(489.82 to 683.41)	33.95(28.23 to 39.35)	-1.55(-1.88 to -1.21)
Djibouti	1.52(0.72 to 2.64)	15.04(7.20 to 26.06)	6.49(2.64 to 11.74)	13.10(5.34 to 23.53)	-0.74(-0.88 to -0.59)
Dominica	2.09(1.35 to 3.05)	27.93(17.94 to 40.86)	2.78(1.88 to 3.99)	28.60(19.31 to 41.26)	-0.28(-0.48 to -0.07)
Dominican Republic	37.54(25.54 to 53.64)	10.21(6.89 to 14.52)	131.22(85.50 to 191.80)	11.03(7.18 to 16.11)	0.14(-0.07 to 0.36)
Ecuador	51.25(43.43 to 59.77)	9.08(7.69 to 10.58)	165.55(127.01 to 215.00)	8.64(6.67 to 11.15)	0.38(0.00 to 0.77)
Egypt	53.87(33.07 to 85.90)	2.23(1.37 to 3.54)	159.58(110.75 to 225.90)	2.82(1.95 to 4.04)	0.83(0.72 to 0.94)
El Salvador	11.52(8.31 to 15.62)	3.34(2.41 to 4.53)	27.17(18.87 to 38.17)	3.36(2.33 to 4.73)	-0.21(-0.35 to -0.06)
Equatorial Guinea	3.19(1.70 to 5.62)	17.89(9.52 to 31.36)	10.06(4.68 to 18.25)	22.94(10.76 to 41.47)	0.78(0.70 to 0.86)
Eritrea	9.01(4.29 to 17.70)	11.13(5.22 to 21.52)	26.63(10.94 to 53.37)	12.60(5.12 to 25.15)	0.04(-0.11 to 0.20)
Estonia	45.11(38.88 to 51.86)	17.54(15.09 to 20.14)	87.78(72.80 to 102.88)	22.03(18.29 to 25.86)	0.45(0.13 to 0.76)
Eswatini	3.98(2.27 to 6.50)	16.54(9.42 to 26.85)	6.78(3.95 to 10.51)	14.18(8.27 to 21.91)	-0.37(-0.59 to -0.16)
Ethiopia	136.66(73.66 to 264.18)	8.01(4.36 to 15.40)	317.11(160.04 to 547.92)	7.56(3.79 to 13.09)	-0.46(-0.68 to -0.24)
Fiji	6.06(4.22 to 8.44)	22.27(15.43 to 31.03)	15.09(10.20 to 21.44)	23.96(16.38 to 33.66)	-0.17(-0.39 to 0.05)
Finland	511.59(437.39 to 587.17)	53.73(45.81 to 61.71)	486.33(394.98 to 568.36)	25.09(20.53 to 29.29)	-2.42(-2.66 to -2.18)
France	2923.21(2472.74 to 3381.18)	25.57(21.61 to 29.58)	2934.44(2381.45 to 3435.20)	13.12(10.71 to 15.42)	-2.69(-2.97 to -2.41)
Gabon	18.21(10.26 to 29.04)	29.87(16.62 to 48.30)	25.22(14.12 to 41.11)	25.91(14.53 to 42.54)	-0.74(-0.87 to -0.61)
Gambia	4.97(1.95 to 10.22)	15.15(5.94 to 31.04)	15.84(6.61 to 30.43)	16.51(6.87 to 31.85)	-0.01(-0.15 to 0.13)
Georgia	26.40(21.25 to 32.27)	3.49(2.79 to 4.26)	141.52(115.59 to 170.40)	17.40(14.25 to 20.93)	7.63(6.31 to 8.96)
Germany	4045.82(3444.06 to 4678.56)	23.28(19.79 to 26.91)	4264.60(3471.52 to 4972.41)	14.86(12.22 to 17.30)	-1.70(-1.84 to -1.56)
Ghana	117.35(52.64 to 210.34)	20.92(9.34 to 37.68)	297.07(128.65 to 540.50)	19.45(8.48 to 35.51)	-0.58(-0.75 to -0.40)
Greece	504.75(432.72 to 579.63)	26.08(22.32 to 29.90)	973.98(807.22 to 1130.09)	26.76(22.31 to 31.10)	-0.47(-0.77 to -0.17)
Greenland	0.79(0.58 to 1.06)	28.11(20.26 to 38.19)	0.87(0.59 to 1.27)	12.72(8.70 to 18.56)	-2.72(-2.88 to -2.55)
Grenada	3.37(2.77 to 4.21)	32.92(27.02 to 41.08)	4.04(3.32 to 4.84)	31.94(26.09 to 38.21)	-1.03(-1.82 to -0.23)
Guam	2.70(1.96 to 3.60)	46.97(34.16 to 62.51)	2.52(1.80 to 3.46)	9.43(6.75 to 12.94)	-4.89(-5.14 to -4.64)
Guatemala	12.39(10.44 to 14.67)	3.95(3.32 to 4.70)	33.96(27.11 to 41.38)	2.75(2.20 to 3.33)	-1.74(-2.01 to -1.47)
Guinea	41.49(18.56 to 86.38)	11.67(5.14 to 24.45)	72.48(24.95 to 153.35)	12.92(4.43 to 27.37)	0.12(0.01 to 0.23)
Guinea-Bissau	6.14(2.97 to 11.71)	16.52(8.10 to 31.61)	8.75(4.24 to 16.67)	14.92(7.22 to 28.46)	-0.57(-0.68 to -0.46)
Guyana	5.36(4.54 to 6.23)	13.64(11.53 to 15.86)	15.58(11.54 to 20.28)	23.16(17.20 to 30.05)	1.20(0.48 to 1.92)
Haiti	48.70(28.10 to 79.81)	16.62(9.71 to 26.82)	103.62(58.55 to 174.36)	16.13(9.10 to 27.11)	-0.10(-0.15 to -0.06)
Honduras	11.20(7.14 to 17.01)	5.40(3.39 to 8.32)	54.87(33.29 to 83.90)	8.32(5.07 to 12.69)	1.55(1.41 to 1.70)
Hungary	374.46(333.27 to 417.60)	20.27(17.99 to 22.60)	498.31(428.08 to 572.00)	18.18(15.63 to 20.87)	-0.61(-0.74 to -0.48)
Iceland	11.91(10.05 to 13.66)	30.81(26.01 to 35.36)	15.65(12.39 to 18.47)	18.75(14.97 to 22.12)	-1.97(-2.30 to -1.63)
India	1890.61(1118.42 to 3106.82)	4.43(2.63 to 7.19)	10313.48(7288.64 to 15064.82)	8.11(5.76 to 11.79)	2.21(1.98 to 2.43)
Indonesia	369.76(232.98 to 521.42)	4.35(2.65 to 6.23)	1445.12(954.64 to 1995.07)	7.27(4.78 to 10.11)	1.53(1.44 to 1.62)
Iran (Islamic Republic of)	40.18(30.27 to 53.10)	1.77(1.33 to 2.32)	277.15(224.38 to 333.48)	3.37(2.72 to 4.07)	2.97(2.59 to 3.36)
Iraq	13.38(8.33 to 20.16)	1.51(0.94 to 2.27)	50.78(32.60 to 73.76)	2.16(1.39 to 3.13)	0.99(0.88 to 1.10)
Ireland	245.73(212.10 to 281.72)	45.85(39.49 to 52.50)	231.60(184.13 to 273.52)	21.33(16.97 to 25.18)	-2.81(-3.14 to -2.47)
Israel	100.70(85.81 to 116.63)	16.48(14.00 to 19.05)	159.79(128.99 to 187.52)	9.28(7.52 to 10.89)	-2.26(-2.46 to -2.05)
Italy	2505.65(2289.17 to 2670.88)	21.15(19.23 to 22.58)	3395.39(2880.51 to 3728.29)	15.07(13.03 to 16.47)	-1.72(-2.05 to -1.39)
Jamaica	29.84(25.13 to 35.60)	12.53(10.54 to 14.94)	49.99(37.35 to 64.69)	12.43(9.30 to 16.14)	-0.19(-0.48 to 0.11)
Japan	4263.88(3908.80 to 4502.55)	20.70(18.81 to 21.93)	22501.25(17679.93 to 25349.58)	34.24(28.10 to 37.88)	1.72(1.57 to 1.87)
Jordan	8.18(5.59 to 11.80)	6.61(4.52 to 9.48)	40.53(27.38 to 58.27)	5.86(3.97 to 8.38)	-0.48(-0.69 to -0.27)
Kazakhstan	117.20(92.15 to 151.45)	8.20(6.41 to 10.66)	265.58(210.27 to 325.27)	13.55(10.70 to 16.59)	0.90(0.60 to 1.20)
Kenya	78.63(49.82 to 116.28)	9.95(6.28 to 14.67)	247.42(143.17 to 350.64)	12.18(7.00 to 17.35)	0.52(0.42 to 0.62)
Kiribati	0.08(0.05 to 0.11)	2.45(1.59 to 3.61)	0.16(0.10 to 0.24)	2.73(1.71 to 4.14)	0.18(0.09 to 0.27)
Kuwait	2.86(2.38 to 3.39)	5.54(4.60 to 6.56)	13.61(10.34 to 17.33)	5.51(4.18 to 7.02)	0.48(-0.45 to 1.41)
Kyrgyzstan	5.28(4.26 to 6.69)	1.56(1.25 to 1.99)	22.95(17.65 to 28.64)	4.68(3.62 to 5.82)	4.37(3.74 to 5.00)
Lao People's Democratic Republic	9.86(5.65 to 15.95)	5.35(3.06 to 8.66)	26.13(16.83 to 40.33)	6.43(4.13 to 9.94)	0.59(0.55 to 0.62)
Latvia	62.45(54.15 to 71.62)	13.68(11.85 to 15.70)	107.18(88.67 to 127.31)	18.78(15.52 to 22.33)	0.68(0.38 to 0.98)
Lebanon	38.59(16.51 to 77.03)	16.41(6.94 to 32.87)	113.85(78.77 to 165.04)	14.09(9.76 to 20.37)	-0.39(-0.62 to -0.17)
Lesotho	9.51(4.70 to 16.70)	11.39(5.72 to 19.86)	12.75(6.19 to 22.31)	13.03(6.53 to 22.23)	0.71(0.56 to 0.85)
Liberia	18.18(8.63 to 35.40)	15.13(7.17 to 29.39)	24.00(9.66 to 50.15)	13.38(5.40 to 27.97)	-0.46(-0.62 to -0.31)
Libya	1.37(0.80 to 2.27)	0.69(0.41 to 1.13)	9.90(5.49 to 16.29)	1.97(1.10 to 3.23)	4.32(3.87 to 4.76)
Lithuania	72.58(62.85 to 83.61)	12.73(11.02 to 14.64)	157.33(131.23 to 185.06)	19.10(15.90 to 22.52)	1.25(1.03 to 1.46)
Luxembourg	21.63(18.62 to 24.98)	30.31(26.09 to 34.97)	23.84(19.77 to 28.10)	16.29(13.52 to 19.23)	-2.50(-2.72 to -2.27)
Madagascar	97.15(43.39 to 181.27)	19.71(8.77 to 36.84)	143.05(63.47 to 257.78)	16.28(7.17 to 29.51)	-0.79(-0.98 to -0.60)
Malawi	34.81(14.92 to 70.67)	9.98(4.29 to 20.25)	82.80(37.37 to 152.19)	12.04(5.53 to 22.07)	0.39(0.25 to 0.53)
Malaysia	224.82(151.06 to 316.86)	23.65(15.90 to 33.37)	842.75(587.70 to 1201.29)	29.10(20.13 to 41.63)	0.33(-0.01 to 0.67)
Maldives	0.31(0.19 to 0.49)	4.50(2.72 to 7.26)	1.32(0.65 to 2.33)	4.19(2.11 to 7.34)	-0.74(-0.91 to -0.56)
Mali	30.20(14.02 to 64.35)	8.47(3.89 to 17.92)	65.23(26.03 to 137.26)	8.09(3.24 to 17.09)	-0.16(-0.39 to 0.08)
Malta	9.89(8.36 to 11.54)	18.70(15.79 to 21.79)	13.14(10.67 to 15.75)	9.18(7.46 to 11.01)	-2.88(-3.25 to -2.51)
Marshall Islands	0.27(0.16 to 0.44)	20.56(11.90 to 33.78)	0.44(0.26 to 0.69)	18.32(10.97 to 28.02)	-0.58(-0.63 to -0.53)
Mauritania	19.38(8.74 to 33.43)	18.55(8.29 to 32.20)	36.01(12.90 to 72.76)	16.47(5.88 to 33.29)	-0.79(-0.99 to -0.59)
Mauritius	7.27(6.26 to 8.36)	10.38(8.89 to 11.92)	12.71(10.65 to 14.81)	6.01(5.04 to 7.00)	-1.49(-1.91 to -1.07)
Mexico	226.85(214.04 to 240.51)	5.40(5.07 to 5.74)	601.21(523.47 to 684.26)	4.16(3.62 to 4.73)	-1.11(-1.28 to -0.94)
Micronesia (Federated States of)	1.16(0.71 to 1.82)	27.39(16.72 to 43.39)	1.27(0.80 to 1.92)	22.61(14.31 to 34.04)	-0.84(-0.96 to -0.72)
Monaco	4.24(2.78 to 6.12)	39.90(26.11 to 57.78)	5.56(3.57 to 8.33)	36.78(23.64 to 54.84)	-0.23(-0.40 to -0.07)
Mongolia	2.17(1.45 to 3.11)	1.93(1.28 to 2.78)	9.00(6.58 to 11.92)	4.36(3.17 to 5.82)	2.83(2.45 to 3.22)
Montenegro	30.71(22.38 to 41.96)	42.01(30.56 to 57.62)	70.08(48.91 to 98.70)	58.34(40.68 to 82.19)	1.37(1.14 to 1.60)
Morocco	11.75(6.52 to 19.18)	0.76(0.42 to 1.26)	102.48(63.88 to 152.78)	2.75(1.71 to 4.11)	4.83(4.60 to 5.06)
Mozambique	67.35(27.05 to 141.02)	12.58(5.14 to 25.89)	154.24(59.69 to 315.52)	15.63(6.26 to 31.50)	0.84(0.77 to 0.91)
Myanmar	114.43(62.54 to 188.57)	5.41(2.99 to 8.80)	317.35(203.51 to 469.67)	6.64(4.25 to 9.86)	0.59(0.55 to 0.64)
Namibia	9.68(5.64 to 15.96)	17.42(10.06 to 28.66)	20.49(12.71 to 31.69)	16.91(10.49 to 26.26)	-0.32(-0.48 to -0.17)
Nauru	0.12(0.07 to 0.19)	31.67(19.95 to 48.61)	0.17(0.08 to 0.30)	41.07(18.02 to 74.82)	0.79(0.75 to 0.83)
Nepal	36.51(17.82 to 69.65)	4.42(2.19 to 8.36)	195.43(114.38 to 329.42)	8.27(4.83 to 13.92)	2.24(2.05 to 2.44)
Netherlands	1439.12(1230.46 to 1661.69)	53.97(46.06 to 62.33)	1393.95(1149.31 to 1619.26)	27.38(22.61 to 31.81)	-2.81(-3.18 to -2.44)
New Zealand	382.53(330.63 to 434.63)	74.77(64.36 to 85.02)	339.22(281.83 to 391.62)	28.90(24.09 to 33.33)	-3.54(-3.71 to -3.36)
Nicaragua	3.58(2.53 to 4.88)	2.22(1.56 to 3.02)	12.43(8.67 to 17.56)	2.29(1.60 to 3.23)	0.12(-0.14 to 0.39)
Niger	21.57(8.62 to 48.89)	9.46(3.79 to 21.42)	58.26(20.76 to 141.83)	8.23(2.92 to 19.96)	-0.61(-0.73 to -0.49)
Nigeria	781.38(398.19 to 1431.94)	18.39(9.38 to 33.51)	1270.19(598.73 to 2269.58)	16.04(7.64 to 28.36)	-0.79(-0.97 to -0.61)
Niue	0.08(0.05 to 0.11)	24.43(15.87 to 35.93)	0.05(0.04 to 0.08)	21.43(13.96 to 31.21)	-0.65(-0.73 to -0.57)
North Macedonia	26.58(18.99 to 36.51)	13.13(9.33 to 18.10)	68.95(42.03 to 106.51)	18.25(11.41 to 27.51)	0.81(0.54 to 1.07)
Northern Mariana Islands	0.34(0.23 to 0.49)	36.43(23.99 to 52.59)	0.95(0.56 to 1.51)	22.36(13.42 to 35.06)	-2.59(-2.89 to -2.28)
Norway	543.46(497.82 to 578.85)	55.04(50.44 to 58.62)	519.38(446.26 to 569.04)	35.48(30.74 to 38.78)	-2.00(-2.31 to -1.68)
Oman	0.66(0.36 to 1.15)	1.01(0.56 to 1.75)	5.93(2.95 to 11.24)	3.47(1.78 to 6.35)	4.86(4.39 to 5.33)
Pakistan	340.81(214.42 to 539.29)	5.75(3.59 to 9.10)	1101.42(745.83 to 1580.50)	10.14(6.79 to 14.59)	1.63(1.34 to 1.92)
Palau	0.19(0.12 to 0.27)	21.46(13.87 to 31.72)	0.34(0.21 to 0.51)	18.80(11.95 to 28.91)	-0.49(-0.52 to -0.46)
Palestine	3.65(2.24 to 5.67)	3.95(2.40 to 6.18)	11.65(7.66 to 17.19)	4.96(3.23 to 7.45)	0.75(0.65 to 0.85)
Panama	26.44(22.03 to 31.04)	15.41(12.83 to 18.07)	65.40(48.42 to 82.19)	11.72(8.69 to 14.74)	-1.37(-1.60 to -1.15)
Papua New Guinea	12.92(6.92 to 22.24)	9.34(4.84 to 16.01)	37.07(21.32 to 60.03)	9.84(5.73 to 15.90)	0.05(-0.03 to 0.13)
Paraguay	32.73(23.49 to 44.90)	12.94(9.29 to 17.75)	125.78(85.98 to 175.42)	18.65(12.77 to 25.96)	1.34(1.23 to 1.44)
Peru	67.06(44.56 to 98.27)	5.14(3.42 to 7.52)	174.27(111.26 to 261.42)	4.27(2.73 to 6.40)	-0.72(-0.87 to -0.56)
Philippines	215.56(175.88 to 258.80)	8.41(6.68 to 10.29)	718.65(580.94 to 860.02)	9.09(7.36 to 10.84)	0.33(0.26 to 0.40)
Poland	1604.21(1521.51 to 1674.51)	29.65(27.97 to 30.99)	2326.74(2047.07 to 2577.93)	23.35(20.57 to 25.89)	-1.29(-1.49 to -1.10)
Portugal	206.10(177.03 to 237.18)	11.79(10.12 to 13.53)	369.74(306.22 to 433.32)	10.17(8.47 to 11.93)	-0.86(-1.04 to -0.68)
Puerto Rico	72.56(62.20 to 83.86)	16.58(14.22 to 19.13)	71.91(56.58 to 88.90)	6.42(5.08 to 7.93)	-3.76(-4.00 to -3.52)
Qatar	0.63(0.42 to 0.92)	10.02(6.69 to 14.50)	3.40(1.69 to 6.59)	6.35(3.48 to 11.38)	-1.78(-2.38 to -1.19)
Republic of Korea	325.98(199.26 to 496.47)	12.86(7.92 to 19.42)	1610.80(1137.16 to 2134.99)	13.72(9.67 to 18.20)	0.19(-0.04 to 0.42)
Republic of Moldova	27.49(23.56 to 31.93)	5.71(4.90 to 6.59)	71.16(60.01 to 83.70)	9.04(7.63 to 10.62)	1.34(0.88 to 1.80)
Romania	257.41(224.44 to 295.40)	8.14(7.09 to 9.33)	583.01(487.18 to 692.49)	11.27(9.41 to 13.39)	0.81(0.67 to 0.96)
Russian Federation	3417.72(3269.46 to 3535.33)	15.82(15.03 to 16.40)	8569.11(7657.27 to 9400.66)	27.00(24.15 to 29.58)	1.48(0.90 to 2.05)
Rwanda	46.20(24.20 to 79.41)	17.98(9.55 to 30.93)	69.82(38.00 to 125.71)	12.50(6.86 to 22.58)	-1.79(-2.13 to -1.45)
Saint Kitts and Nevis	1.31(1.12 to 1.52)	25.81(22.03 to 29.95)	1.19(0.93 to 1.55)	17.75(14.05 to 22.56)	-1.40(-1.66 to -1.14)
Saint Lucia	7.03(5.92 to 8.29)	74.48(62.57 to 88.42)	10.28(8.19 to 12.63)	35.89(28.61 to 44.04)	-3.33(-3.71 to -2.95)
Saint Vincent and the Grenadines	1.59(1.36 to 1.86)	18.27(15.58 to 21.25)	2.44(2.03 to 2.91)	14.74(12.28 to 17.51)	-1.27(-1.57 to -0.96)
Samoa	1.76(1.04 to 2.69)	22.35(13.06 to 34.20)	2.57(1.65 to 3.80)	18.03(11.42 to 26.91)	-0.83(-0.93 to -0.73)
San Marino	1.07(0.71 to 1.56)	22.13(14.75 to 32.51)	1.38(0.76 to 2.31)	12.03(6.54 to 20.18)	-0.84(-1.25 to -0.43)
Sao Tome and Principe	0.87(0.37 to 1.72)	12.60(5.22 to 25.32)	1.59(0.72 to 3.04)	15.57(7.02 to 29.86)	0.78(0.64 to 0.93)
Saudi Arabia	2.56(1.58 to 3.94)	0.48(0.30 to 0.73)	16.40(10.58 to 25.20)	1.22(0.78 to 1.92)	3.70(3.31 to 4.10)
Senegal	47.45(20.48 to 95.70)	14.55(6.27 to 29.60)	111.52(44.13 to 221.70)	14.61(5.76 to 29.08)	-0.31(-0.45 to -0.18)
Serbia	314.07(227.00 to 420.03)	28.13(20.42 to 37.66)	616.87(432.26 to 849.71)	27.08(18.99 to 37.32)	-0.05(-0.12 to 0.03)
Seychelles	0.52(0.36 to 0.74)	7.28(5.05 to 10.38)	0.88(0.51 to 1.42)	7.34(4.30 to 11.81)	0.12(-0.07 to 0.32)
Sierra Leone	32.72(14.40 to 65.28)	14.68(6.49 to 29.27)	46.74(18.57 to 96.85)	12.79(5.10 to 26.41)	-0.66(-0.75 to -0.57)
Singapore	42.01(36.26 to 48.15)	18.22(15.67 to 20.88)	156.77(130.18 to 182.05)	15.20(12.61 to 17.67)	-0.46(-0.66 to -0.25)
Slovakia	105.88(80.88 to 139.23)	13.92(10.62 to 18.25)	182.08(128.77 to 250.38)	14.37(10.18 to 19.74)	0.08(0.00 to 0.17)
Slovenia	51.95(44.80 to 59.41)	16.70(14.38 to 19.11)	97.34(77.97 to 121.11)	15.08(12.10 to 18.77)	-0.57(-0.90 to -0.24)
Solomon Islands	1.11(0.61 to 1.98)	11.89(6.65 to 20.64)	3.27(1.89 to 5.35)	13.10(7.35 to 21.82)	0.18(0.09 to 0.28)
Somalia	14.54(6.65 to 31.64)	8.38(3.83 to 18.22)	26.81(11.64 to 65.44)	5.63(2.43 to 13.59)	-1.42(-1.55 to -1.29)
South Africa	427.97(309.20 to 558.36)	20.28(14.65 to 26.44)	694.50(586.37 to 816.81)	14.87(12.54 to 17.49)	-1.78(-2.18 to -1.39)
South Sudan	35.39(12.98 to 71.46)	13.09(5.01 to 26.08)	29.77(11.89 to 59.05)	9.23(3.72 to 18.33)	-1.44(-1.62 to -1.26)
Spain	1228.83(1036.23 to 1440.08)	17.12(14.45 to 20.03)	2070.99(1677.75 to 2447.50)	14.43(11.76 to 17.07)	-1.20(-1.50 to -0.90)
Sri Lanka	23.38(16.57 to 31.94)	2.42(1.71 to 3.28)	77.30(48.03 to 117.61)	2.60(1.63 to 3.91)	0.76(0.52 to 0.99)
Sudan	5.59(2.67 to 13.67)	0.57(0.28 to 1.36)	38.08(22.01 to 60.55)	2.00(1.17 to 3.17)	4.76(4.49 to 5.02)
Suriname	4.54(3.17 to 6.38)	16.47(11.50 to 23.09)	10.10(6.19 to 15.58)	13.80(8.46 to 21.28)	-0.60(-0.76 to -0.43)
Sweden	1151.61(1004.02 to 1292.58)	52.82(46.05 to 59.27)	939.75(768.99 to 1094.48)	28.24(23.23 to 32.91)	-2.48(-2.79 to -2.16)
Switzerland	493.56(414.38 to 576.50)	34.19(28.69 to 39.99)	463.54(369.93 to 541.89)	16.70(13.41 to 19.54)	-2.36(-2.54 to -2.18)
Syrian Arab Republic	11.04(6.92 to 16.82)	2.06(1.30 to 3.13)	34.30(21.98 to 51.30)	2.56(1.62 to 3.82)	0.56(0.41 to 0.71)
Taiwan (Province of China)	134.40(115.28 to 155.77)	7.94(6.80 to 9.18)	766.70(639.34 to 898.30)	13.74(11.49 to 16.08)	0.78(0.05 to 1.51)
Tajikistan	5.18(3.09 to 8.21)	1.73(1.02 to 2.76)	8.38(5.37 to 12.62)	1.61(1.04 to 2.43)	-0.31(-0.63 to 0.01)
Thailand	432.36(279.69 to 645.95)	14.31(9.25 to 21.37)	1872.49(1252.93 to 2655.78)	13.76(9.22 to 19.48)	-0.57(-0.71 to -0.42)
Timor-Leste	0.76(0.48 to 1.24)	3.81(2.35 to 6.16)	4.50(2.63 to 7.36)	5.23(3.00 to 8.54)	1.13(1.03 to 1.24)
Togo	18.01(7.90 to 35.64)	16.10(7.06 to 31.94)	50.03(19.75 to 100.13)	15.50(6.14 to 31.05)	-0.47(-0.60 to -0.33)
Tokelau	0.03(0.02 to 0.05)	22.14(13.71 to 33.47)	0.04(0.02 to 0.07)	22.76(11.74 to 38.80)	-0.16(-0.24 to -0.08)
Tonga	1.03(0.67 to 1.53)	19.14(12.29 to 28.93)	1.87(1.13 to 2.90)	20.11(12.20 to 31.26)	0.03(-0.16 to 0.21)
Trinidad and Tobago	35.35(30.03 to 41.30)	38.37(32.25 to 44.89)	64.88(48.41 to 84.65)	27.19(20.36 to 35.34)	-1.60(-1.90 to -1.30)
Tunisia	4.84(2.93 to 7.36)	0.93(0.56 to 1.42)	42.66(24.73 to 69.55)	2.85(1.63 to 4.70)	4.15(3.83 to 4.47)
Turkey	437.67(273.67 to 670.39)	11.73(7.36 to 17.86)	1543.76(1079.02 to 2174.85)	13.82(9.65 to 19.40)	0.57(0.37 to 0.78)
Turkmenistan	12.16(9.74 to 15.12)	6.06(4.83 to 7.59)	45.68(33.82 to 65.18)	11.04(8.23 to 15.69)	1.81(1.64 to 1.98)
Tuvalu	0.11(0.07 to 0.18)	20.31(11.80 to 32.97)	0.19(0.13 to 0.27)	19.32(12.75 to 28.09)	-0.35(-0.42 to -0.27)
Uganda	65.83(28.58 to 133.07)	10.54(4.71 to 21.20)	142.67(66.06 to 261.16)	10.78(5.07 to 19.70)	-0.21(-0.35 to -0.08)
Ukraine	1104.06(940.47 to 1301.15)	12.04(10.22 to 14.23)	1388.31(1025.60 to 1828.29)	13.21(9.75 to 17.39)	0.00(-0.24 to 0.25)
United Arab Emirates	2.47(1.36 to 4.01)	7.97(4.47 to 12.86)	18.13(12.50 to 25.85)	10.11(6.67 to 14.61)	3.18(2.30 to 4.08)
United Kingdom	9128.60(8578.03 to 9466.91)	72.17(67.61 to 74.95)	5809.86(5094.49 to 6211.69)	29.73(26.27 to 31.72)	-3.44(-3.81 to -3.07)
United Republic of Tanzania	158.81(85.08 to 285.41)	15.27(8.23 to 27.43)	414.40(185.14 to 795.26)	16.89(7.65 to 32.20)	-0.07(-0.24 to 0.11)
United States of America	15887.69(14448.05 to 16757.72)	36.45(33.11 to 38.46)	10370.24(9013.10 to 11199.98)	12.78(11.16 to 13.79)	-4.06(-4.32 to -3.79)
United States Virgin Islands	1.89(1.32 to 2.59)	23.18(16.00 to 32.19)	3.33(2.17 to 4.87)	14.05(9.14 to 20.92)	-1.82(-2.02 to -1.61)
Uruguay	192.29(163.36 to 222.86)	37.56(31.88 to 43.53)	225.41(189.07 to 261.58)	28.65(24.07 to 33.30)	-1.25(-1.51 to -0.99)
Uzbekistan	16.40(11.62 to 24.76)	1.26(0.89 to 1.91)	169.29(133.82 to 210.94)	6.90(5.46 to 8.62)	6.23(5.42 to 7.04)
Vanuatu	0.68(0.39 to 1.14)	14.06(7.86 to 23.18)	1.85(1.12 to 2.86)	13.84(8.42 to 21.71)	-0.17(-0.28 to -0.06)
Venezuela (Bolivarian Republic of)	158.08(135.22 to 184.24)	15.10(12.88 to 17.61)	443.62(333.21 to 573.87)	12.80(9.67 to 16.49)	-1.05(-1.37 to -0.74)
Viet Nam	201.00(124.10 to 312.64)	4.69(2.88 to 7.29)	755.53(469.40 to 1157.06)	7.59(4.71 to 11.65)	1.63(1.56 to 1.71)
Yemen	2.76(1.36 to 5.10)	0.57(0.29 to 1.03)	27.11(14.38 to 46.16)	1.99(1.07 to 3.36)	4.72(4.34 to 5.10)
Zambia	38.57(21.27 to 66.27)	15.28(8.38 to 26.15)	133.33(56.11 to 246.17)	22.07(9.65 to 40.16)	1.29(0.89 to 1.70)
Zimbabwe	83.48(56.88 to 119.61)	23.54(15.94 to 34.15)	150.33(96.63 to 218.18)	26.19(16.72 to 37.99)	0.30(0.14 to 0.45)
