# Supplementary material for: Global burden of aortic aneurysm in adults aged 60 and older from 1990 to 2021 and projections to 2040: based on the Global Burden of Disease Study 2021
Source: Research Square preprint supplement (doi:10.21203/rs.3.rs-7393211/v1), 2025-10-01
Supplement: Supplementary file 2 [file 6f85eef4e5d463f302bdb754.xlsx]

## Sheet: Sheet1
The deaths and DALYs among different age groups of males and females between 1990 and 2021
Sex	Age (years)	Deaths cases (95% UI)		DALYs (95% UI)
		1990	2021	1990	2021
Male	60-64 years	5828.10 ( 5409.87 to 6464.37 )	8345.76 ( 7787.64 to 9180.67 )	168153.67 (156067.87 to 186541.79)	241034.48 (224895.02 to 265180.60)
	65-69 years	8356.08 ( 7809.23 to 9116.12 )	11425.80 ( 10603.56 to 12616.22 )	203233.77 (189924.8 to 221746.02)	277989.58 (257969.98 to 306968.23)
	70-74 years	9219.20 ( 8676.54 to 9939.02 )	13805.14 ( 12949.56 to 15213.96 )	184341.14 (173469.03 to 198779.27)	276016.46 (258885.18 to 304295.66)
	75-79 years	10763.67 ( 10173.78 to 11463.10 )	13297.35 ( 12314.03 to 14557.91 )	171781.58 (162347.68 to 182985.39)	212201.15 (196475.77 to 232424.10)
	80-84 years	7913.91 ( 7306.79 to 8406.35 )	12726.58 ( 11356.77 to 13895.22 )	99137.65 (91531.32 to 105317.63)	158766.04 (141684.71 to 173421.77)
	85-89 years	4110.74 ( 3686.26 to 4396.74 )	9996.57 ( 8696.27 to 10773.29 )	40900.98 (36679.80 to 43749.75)	98908.00 (86050.28 to 106607.57)
	90-94 years	1339.05 ( 1160.92 to 1444.91 )	5204.03 ( 4387.37 to 5673.87 )	11545.06 (10009.29 to 12457.97)	44834.21 (37799.39 to 48881.99)
	95+ years	292.88 ( 236.06 to 321.51 )	1519.66 ( 1156.94 to 1697.07 )	2385.67 (1923.92 to 2618.27)	12109.72 (9231.96 to 13519.60)
Female	60-64 years	1955.89 (1761.46 to 2292.66)	3323.38 (3006.94 to 3778.60)	56348.82 (50735.09 to 66076.32)	95920.38 (86781.75 to 109068.85)
	65-69 years	3137.02 (2872.35 to 3544.85)	5058.29 (4610.31 to 5561.62)	76172.67 (69742.35 to 86088.66)	122879.03 (112000.87 to 135115.57)
	70-74 years	4109.94 (3762.28 to 4604.94)	7212.31 (6484.05 to 8060.11)	81972.35 (75024.39 to 91878.79)	143911.34 (129357.45 to 160857.95)
	75-79 years	5847.97 (5360.27 to 6369.39)	8210.87 (7265.50 to 8966.72)	92972.35 (85198.89 to 101299.38)	130477.29 (115515.78 to 142531.66)
	80-84 years	5555.57 (4881.96 to 6005.34)	9830.21 (8218.34 to 10872.35)	69206.30 (60810.92 to 74819.24)	122066.33 (102086.34 to 135034.44)
	85-89 years	4080.99 (3398.81 to 4447.90)	9704.90 (7418.96 to 11081.19)	40379.63 (33633.38 to 44015.56)	95557.14 (73095.64 to 109080.56)
	90-94 years	1848.68 (1460.81 to 2036.87)	6984.37 (5046.05 to 8072.97)	15925.67 (12584.47 to 17546.81)	60106.00 (43427.23 to 69473.07)
	95+ years	581.72 (433.45 to 657.30)	3514.60 (2367.20 to 4170.68)	4722.04 (3520.38 to 5334.19)	27883.99 (18822.93 to 33055.75)
