# Supplementary material for: Global burden of aortic aneurysm in adults aged 60 and older from 1990 to 2021 and projections to 2040: based on the Global Burden of Disease Study 2021
Source: Research Square preprint supplement (doi:10.21203/rs.3.rs-7393211/v1), 2025-10-01
Supplement: Supplementary file 3 [file 7e67e400909488a5334a1825.xlsx]

## Sheet: Sheet1
The DALYs and ASDR in the elderly AA across 204 countries between 1990 and 2021
Location	1990		2021		1990-2021
	DALYs (95% UI)	ASDR per 100,000 (95% UI)	DALYs (95% UI)	ASDR per 100,000 (95% UI)	EAPC in ASDR (95% CI)
Afghanistan	77.22(38.23 to 139.09)	9.39(4.67 to 16.79)	270.54(155.35 to 428.52)	32.94(18.72 to 52.59)	4.80(4.51 to 5.09)
Albania	246.61(183.46 to 324.34)	107.54(79.87 to 141.54)	711.03(407.27 to 1123.26)	121.91(70.22 to 191.80)	0.52(0.37 to 0.66)
Algeria	202.48(123.94 to 312.32)	16.03(9.63 to 24.86)	1595.72(1014.77 to 2435.53)	41.84(26.12 to 64.09)	3.97(3.59 to 4.35)
American Samoa	8.16(5.63 to 11.36)	395.96(270.90 to 561.35)	13.89(9.56 to 19.46)	276.33(189.06 to 389.84)	-1.49(-1.66 to -1.33)
Andorra	56.6(32.12 to 95.41)	801.91(451.11 to 1358.35)	88.94(49.60 to 149.81)	447.96(248.97 to 755.71)	-1.81(-2.07 to -1.56)
Angola	1206.67(613.30 to 2026.11)	321.81(165.57 to 537.71)	3889.64(2111.00 to 6543.72)	348.84(189.14 to 584.93)	0.09(-0.01 to 0.19)
Antigua and Barbuda	25.61(21.71 to 30.13)	354.58(300.35 to 417.31)	29.98(25.05 to 36.53)	237.12(198.27 to 287.88)	-2.01(-2.33 to -1.69)
Argentina	25797.60(21883.53 to 30148.27)	625.61(530.46 to 730.55)	23277.41(19616.03 to 27288.57)	318.93(268.77 to 374.10)	-2.33(-2.55 to -2.11)
Armenia	1632.86(1307.39 to 2042.50)	511.3(408.46 to 641.42)	6162.38(5069.26 to 7364.60)	1068.23(879.14 to 1276.47)	2.64(2.32 to 2.97)
Australia	23886.64(20740.21 to 27237.31)	928.21(804.07 to 1058.25)	16028.15(13378.82 to 18485.93)	253.42(212.02 to 292.55)	-4.73(-4.91 to -4.55)
Austria	6035.84(5227.49 to 6883.96)	376.37(325.47 to 429.40)	5184.37(4316.15 to 6020.07)	210.82(176.69 to 244.71)	-2.11(-2.31 to -1.92)
Azerbaijan	436.17(299.22 to 622.21)	78.58(53.38 to 112.73)	1875.37(1096.57 to 3046.26)	159.07(96.27 to 250.77)	2.84(2.53 to 3.15)
Bahamas	79.30(66.87 to 93.99)	454.45(382.82 to 538.68)	150.76(119.51 to 186.40)	328.31(261.05 to 404.95)	-1.20(-1.54 to -0.85)
Bahrain	12.13(8.60 to 17.32)	75.17(53.23 to 106.71)	63.59(40.77 to 97.62)	80.54(52.77 to 121.38)	0.28(-0.13 to 0.68)
Bangladesh	4802.64(2366.10 to 9580.26)	94.77(47.21 to 187.37)	20875.23(11914.18 to 37178.92)	133.22(75.90 to 236.31)	1.13(0.99 to 1.28)
Barbados	136.02(116.03 to 158.78)	333.47(284.61 to 388.88)	173.16(131.47 to 221.19)	252.7(192.23 to 322.41)	-1.54(-1.84 to -1.23)
Belarus	4566.30(3737.21 to 5695.57)	272.68(222.91 to 339.43)	8806.84(6945.14 to 11008.00)	402.77(317.80 to 502.85)	0.93(0.59 to 1.27)
Belgium	12592.49(10684.92 to 14596.52)	607.78(515.12 to 704.98)	8354.67(6832.98 to 9778.62)	255.51(210.74 to 299.04)	-3.10(-3.26 to -2.93)
Belize	13.54(11.18 to 16.61)	119.41(98.66 to 146.50)	33.68(27.47 to 40.30)	103.52(84.50 to 123.67)	-1.18(-1.89 to -0.46)
Benin	422.17(184.01 to 809.7)	185.87(80.99 to 357.37)	964.22(366.14 to 1926.41)	183.67(69.97 to 366.43)	-0.21(-0.33 to -0.10)
Bermuda	106.11(91.68 to 122.53)	1401.98(1210.15 to 1618.05)	89.12(70.78 to 111.73)	470.14(373.31 to 590.34)	-3.64(-3.79 to -3.49)
Bhutan	21.07(12.01 to 34.64)	91.33(51.99 to 149.35)	117.80(66.69 to 195.44)	168.46(95.39 to 279.37)	2.19(2.13 to 2.25)
Bolivia (Plurinational State of)	482.1(267.59 to 776.59)	138.29(77.58 to 221.28)	1580.09(972.19 to 2438.21)	151.89(93.72 to 233.88)	0.36(0.32 to 0.39)
Bosnia and Herzegovina	1132.96(765.32 to 1625.58)	246.45(166.85 to 352.16)	3025.72(2033.34 to 4281.35)	359.78(241.81 to 508.72)	1.43(1.28 to 1.58)
Botswana	156.8(87.75 to 271.04)	281.98(158.64 to 480.29)	337.77(195.19 to 510.35)	240.46(138.32 to 369.69)	-0.74(-0.92 to -0.56)
Brazil	38275.42(35564.34 to 40791.45)	373.70(345.36 to 398.93)	143570.96(129262.52 to 155439.70)	460.92(413.99 to 499.30)	0.41(0.13 to 0.69)
Brunei Darussalam	63.67(36.76 to 101.09)	629.52(363.83 to 1002.48)	173.57(123.80 to 238.17)	519.78(367.24 to 721.42)	-0.23(-0.38 to -0.09)
Bulgaria	3206.42(2744.16 to 3704.30)	206.01(177.4 to 236.60)	5566.46(4389.62 to 7013.17)	287.83(226.87 to 362.65)	0.99(0.71 to 1.28)
Burkina Faso	948.71(447.12 to 2034.03)	201.76(95.09 to 433.06)	2340.00(1050.80 to 4832.45)	241.65(109.21 to 499.09)	0.76(0.69 to 0.83)
Burundi	725.31(353.47 to 1299.94)	280.42(136.88 to 504.32)	781.35(320.60 to 1541.53)	165.98(67.66 to 329.83)	-2.21(-2.55 to -1.86)
Cabo Verde	63.39(22.38 to 136.80)	207.7(73.27 to 447.18)	138.59(61.45 to 264.57)	278.19(123.67 to 531.46)	0.34(-0.01 to 0.69)
Cambodia	291.76(155.21 to 489.68)	64.32(33.80 to 108.02)	1072.58(615.55 to 1818.29)	84.16(47.39 to 143.59)	0.94(0.82 to 1.05)
Cameroon	1299.65(733.22 to 2398.20)	285.62(161.33 to 526.99)	3408.84(1847.68 to 6016.22)	272.25(148.94 to 477.43)	-0.51(-0.66 to -0.37)
Canada	33610.43(29160.46 to 38644.01)	790.63(684.92 to 908.93)	23824.25(19855.85 to 27704.17)	236.30(197.52 to 274.87)	-4.57(-4.85 to -4.30)
Central African Republic	365.18(189.03 to 671.39)	325.35(169.45 to 599.12)	509.42(239.47 to 976.26)	256.95(120.44 to 490.89)	-0.97(-1.06 to -0.88)
Chad	536.51(234.72 to 1172.52)	164.20(71.34 to 360.45)	1029.42(398.65 to 2199.65)	176.89(68.91 to 378.70)	0.01(-0.11 to 0.12)
Chile	3749.93(3262.45 to 4306.00)	313.22(272.18 to 359.42)	8214.23(6926.54 to 9541.74)	247.76(209.00 to 287.78)	-0.87(-1.17 to -0.57)
China	27506.33(21672.36 to 35238.66)	29.98(23.72 to 38.02)	105998.44(82967.25 to 134632.24)	40.56(31.74 to 51.41)	1.21(1.06 to 1.36)
Colombia	8225.02(7130.93 to 9462.91)	415.23(359.55 to 477.15)	23889.32(18780.57 to 29715.43)	347.18(273.40 to 431.54)	-1.78(-2.18 to -1.38)
Comoros	57.13(21.64 to 110.20)	274.64(105.42 to 529.17)	116.59(41.15 to 231.99)	223.40(78.84 to 445.81)	-1.05(-1.24 to -0.85)
Congo	543.67(312.02 to 875.53)	474.46(269.77 to 762.28)	1023.91(570.27 to 1696.77)	401.20(222.77 to 668.83)	-0.85(-1.05 to -0.65)
Cook Islands	4.89(3.25 to 7.05)	369.75(244.4 to 535.43)	10.11(4.98 to 19.43)	306.92(151.61 to 590.23)	-0.79(-0.88 to -0.71)
Costa Rica	568.29(480.75 to 669.75)	276.13(233.48 to 325.35)	1869.79(1529.67 to 2227.98)	271.40(222.36 to 323.15)	-0.50(-0.75 to -0.25)
Coted'Ivoire	1092.56(466.63 to 2066.52)	300.40(130.87 to 570.28)	3011.59(1218.26 to 5853.42)	282.80(116.13 to 551.68)	-0.65(-0.83 to -0.48)
Croatia	2248.03(1932.13 to 2627.75)	305.90(262.94 to 356.99)	4854.09(4021.65 to 5712.25)	395.01(326.59 to 465.95)	0.69(0.42 to 0.95)
Cuba	8700.69(7531.15 to 9991.10)	675.58(583.87 to 775.20)	11318.87(9329.12 to 13512.01)	447.74(368.67 to 535.13)	-1.70(-1.89 to -1.50)
Cyprus	780.06(503.35 to 1145.85)	855.83(538.46 to 1271.10)	1219.39(807.63 to 1777.62)	452.78(298.5 to 661.20)	-2.49(-2.71 to -2.28)
Czechia	6289.63(5632.00 to 7045.59)	343.19(307.28 to 384.27)	9812.94(8308.18 to 11361.90)	332.75(280.61 to 386.93)	-0.37(-0.77 to 0.04)
Democratic People's Republic of Korea	825.94(512.90 to 1242.45)	48.02(29.64 to 72.78)	1828.99(1170.97 to 2764.20)	46.55(29.54 to 70.99)	0.15(0.03 to 0.26)
Democratic Republic of the Congo	4878.57(2245.97 to 9240.33)	308.77(140.41 to 586.83)	9176.56(4242.13 to 17317.12)	259.85(119.80 to 489.91)	-0.72(-1.05 to -0.40)
Denmark	9281.15(7952.02 to 10744.90)	848.25(726.79 to 982.45)	8730.37(7328.59 to 10124.03)	519.50(436.67 to 602.76)	-2.17(-2.52 to -1.82)
Djibouti	31.09(14.79 to 54.40)	261.12(124.69 to 453.68)	131.06(53.28 to 239.13)	224.73(91.51 to 406.17)	-0.79(-0.93 to -0.64)
Dominica	34.97(22.44 to 51.16)	450.52(288.63 to 660.80)	47.76(32.57 to 68.15)	468.13(318.63 to 669.65)	-0.23(-0.42 to -0.04)
Dominican Republic	663.54(453.28 to 951.21)	164.90(112.14 to 235.75)	2245.45(1470.37 to 3269.47)	187.00(122.46 to 272.20)	0.26(0.08 to 0.45)
Ecuador	877.57(743.10 to 1023.75)	148.44(125.66 to 173.07)	2750.72(2074.86 to 3632.23)	139.12(105.38 to 183.00)	0.21(-0.16 to 0.58)
Egypt	1119.21(684.08 to 1792.85)	40.09(24.58 to 63.92)	3340.19(2309.63 to 4720.63)	50.18(34.83 to 71.25)	0.76(0.66 to 0.86)
El Salvador	210.91(152.38 to 285.29)	60.27(43.55 to 81.54)	465.28(319.88 to 657.22)	59.72(41.00 to 84.41)	-0.27(-0.42 to -0.11)
Equatorial Guinea	65.77(34.88 to 116.48)	325.81(173.08 to 574.04)	194.17(89.18 to 355.76)	399.53(184.95 to 727.80)	0.59(0.50 to 0.69)
Eritrea	201.02(95.84 to 399.69)	207.12(98.04 to 403.90)	531.93(219.06 to 1069.93)	215.19(88.05 to 431.06)	-0.26(-0.42 to -0.11)
Estonia	847.19(731.13 to 975.75)	321.04(276.98 to 369.27)	1412.82(1175.59 to 1663.89)	379.97(316.39 to 448.28)	0.21(-0.11 to 0.52)
Eswatini	73.88(42.10 to 121.08)	269.45(153.6 to 439.72)	134.03(78.06 to 210.32)	241.26(140.70 to 375.50)	-0.32(-0.54 to -0.10)
Ethiopia	2835.69(1531.55 to 5485.58)	141.36(76.71 to 272.62)	5765.74(2902.64 to 10006.57)	127.34(63.98 to 220.94)	-0.64(-0.87 to -0.42)
Fiji	117.1(81.68 to 163.02)	362.89(252.31 to 505.38)	288.50(193.26 to 413.57)	377.24(255.28 to 535.25)	-0.24(-0.42 to -0.05)
Finland	9123.97(7827.53 to 10471.50)	958.69(820.99 to 1100.69)	7339.22(6057.25 to 8563.78)	404.05(335.52 to 470.95)	-2.76(-3.01 to -2.52)
France	46805.63(39608.86 to 54435.14)	421.41(356.6 to 490.40)	42163.32(34582.11 to 49509.53)	211.11(174.08 to 248.60)	-2.78(-3.04 to -2.52)
Gabon	342.51(194.84 to 541.38)	517.72(292.09 to 825.55)	494.27(274.51 to 805.99)	453.40(252.99 to 741.14)	-0.69(-0.81 to -0.57)
Gambia	95.95(37.28 to 199.11)	263.14(102.53 to 543.45)	292.08(121.22 to 563.11)	283.40(117.58 to 546.73)	-0.09(-0.25 to 0.07)
Georgia	520.14(421.79 to 636.57)	65.11(52.64 to 79.6)	2631.70(2154.01 to 3172.58)	326.20(267.49 to 392.90)	7.60(6.26 to 8.95)
Germany	66239.98(56579.74 to 76525.44)	388.96(332.16 to 449.35)	66336.64(54855.92 to 77251.52)	252.02(210.25 to 293.10)	-1.68(-1.84 to -1.51)
Ghana	2289.31(1025.72 to 4106.45)	361.46(161.71 to 649.32)	5710.40(2451.27 to 10374.87)	333.20(144.04 to 606.71)	-0.60(-0.77 to -0.42)
Greece	8732.49(7493.58 to 10074.69)	439.52(376.78 to 506.63)	14905.02(12451.76 to 17336.82)	461.73(387.62 to 537.88)	-0.39(-0.66 to -0.12)
Greenland	15.36(11.23 to 20.52)	483.95(351.32 to 651.43)	17.02(11.51 to 24.97)	216.36(147.22 to 316.64)	-2.73(-2.91 to -2.55)
Grenada	56.69(46.53 to 70.76)	581.60(477.38 to 726.07)	74.36(60.95 to 89.11)	550.45(450.39 to 659.61)	-1.14(-1.87 to -0.40)
Guam	53.35(38.57 to 71.24)	743.80(539.66 to 991.35)	47.46(34.53 to 64.61)	175.23(127.58 to 238.58)	-4.50(-4.73 to -4.28)
Guatemala	238.31(201.08 to 281.85)	66.55(56.01 to 78.93)	605.95(479.97 to 745.66)	46.81(37.19 to 57.41)	-1.72(-1.98 to -1.46)
Guinea	774.06(349.84 to 1600.93)	200.21(89.67 to 416.03)	1338.48(462.86 to 2832.05)	221.11(76.27 to 468.03)	0.09(-0.02 to 0.21)
Guinea-Bissau	123.99(59.43 to 236.94)	295.02(142.96 to 564.37)	176.98(85.81 to 339.75)	260.06(125.98 to 496.87)	-0.67(-0.78 to -0.55)
Guyana	101.2(85.83 to 117.78)	240.79(204.08 to 280.19)	305.24(224.60 to 399.56)	413.87(305.94 to 539.73)	1.27(0.59 to 1.96)
Haiti	967.62(554.18 to 1604.86)	286.37(165.56 to 468.67)	2018.67(1132.43 to 3399.67)	277.6(156.35 to 467.19)	-0.11(-0.15 to -0.06)
Honduras	206.73(133.04 to 311.61)	92.45(58.95 to 140.37)	1016.15(614.66 to 1554.45)	142.01(86.12 to 216.93)	1.58(1.45 to 1.71)
Hungary	6894.03(6163.07 to 7681.56)	357.01(318.71 to 397.61)	8929.76(7725.26 to 10223.25)	334.76(289.81 to 383.37)	-0.52(-0.65 to -0.39)
Iceland	194.25(164.92 to 223.92)	511.88(434.87 to 590.57)	227.71(183.69 to 268.80)	284.84(230.95 to 336.13)	-2.29(-2.62 to -1.97)
India	38231.89(22525.67 to 63562.7)	79.59(47.07 to 130.80)	191821.20(134592.99 to 281427.12)	139.26(98.10 to 203.69)	1.95(1.77 to 2.13)
Indonesia	6953.66(4500.17 to 9700.05)	72.64(45.83 to 102.38)	26610.39(17514.07 to 36647.40)	114.53(75.47 to 158.48)	1.32(1.23 to 1.40)
Iran (Islamic Republic of)	816.41(615.83 to 1082.24)	30.30(22.83 to 39.91)	4970.08(4061.24 to 5934.97)	57.20(46.62 to 68.55)	2.95(2.56 to 3.35)
Iraq	268.09(166.38 to 403.91)	29.69(18.44 to 44.71)	1046.23(665.51 to 1522.35)	40.59(25.98 to 58.99)	0.85(0.76 to 0.95)
Ireland	4271.36(3693.47 to 4900.66)	776.33(670.52 to 890.18)	3412.73(2751.02 to 4020.10)	319.53(257.86 to 376.28)	-3.27(-3.63 to -2.91)
Israel	1709.08(1461.86 to 1982.87)	268.81(229.50 to 311.50)	2422.17(1986.69 to 2843.61)	145.16(119.38 to 170.47)	-2.39(-2.60 to -2.19)
Italy	44272.06(40960.73 to 47087.53)	370.67(342.24 to 394.50)	49787.44(43362.95 to 54295.37)	245.18(217.21 to 266.24)	-2.00(-2.32 to -1.69)
Jamaica	496.39(419.85 to 591.66)	210.36(177.85 to 250.74)	823.78(609.52 to 1079.69)	211.36(156.48 to 277.38)	-0.16(-0.47 to 0.16)
Japan	72261.08(67208.75 to 75931.99)	338.51(313.14 to 356.42)	293271.20(240566.60 to 324500.27)	525.29(449.67 to 570.57)	1.50(1.38 to 1.62)
Jordan	169.75(115.76 to 246.49)	124.32(84.92 to 179.53)	808.79(545.03 to 1167.66)	104.98(70.93 to 151.05)	-0.69(-0.92 to -0.45)
Kazakhstan	2408.28(1913.42 to 3086.53)	158.21(125.30 to 203.25)	5425.18(4300.74 to 6651.74)	251.16(198.84 to 307.91)	0.71(0.38 to 1.03)
Kenya	1441.08(915.26 to 2135.56)	166.60(105.57 to 246.40)	4761.44(2752.41 to 6737.41)	205.58(118.65 to 291.67)	0.55(0.46 to 0.64)
Kiribati	1.59(1.07 to 2.27)	42.29(28.02 to 61.36)	3.26(2.04 to 4.93)	46.19(28.92 to 69.81)	0.11(0.03 to 0.19)
Kuwait	60.06(50.22 to 71.55)	105.85(88.43 to 125.82)	252.18(191.34 to 322.74)	95.81(72.69 to 122.56)	0.19(-0.73 to 1.13)
Kyrgyzstan	103.79(84.73 to 128.25)	28.86(23.51 to 35.84)	462.70(354.01 to 580.38)	85.82(65.96 to 107.33)	4.25(3.65 to 4.85)
Lao People's Democratic Republic	193.05(109.37 to 313.83)	90.37(51.42 to 146.55)	467.65(300.45 to 724.14)	103.03(66.20 to 159.31)	0.41(0.37 to 0.45)
Latvia	1168.52(1012.38 to 1343.56)	251.94(218.09 to 289.87)	1833.90(1517.07 to 2183.42)	341.04(281.90 to 406.38)	0.55(0.24 to 0.85)
Lebanon	779.84(338.49 to 1547.79)	305.39(131.27 to 609.44)	1826.03(1269.70 to 2619.86)	236.69(164.69 to 338.80)	-0.77(-1.01 to -0.53)
Lesotho	164.33(79.86 to 292.48)	179.26(88.33 to 316.46)	245.71(116.71 to 437.73)	217.24(105.98 to 378.81)	0.88(0.76 to 1.01)
Liberia	342.52(162.09 to 673.70)	257.38(121.9 to 503.84)	445.26(178.93 to 932.14)	226.01(91.07 to 472.85)	-0.51(-0.67 to -0.35)
Libya	25.37(15.01 to 42.26)	12.17(7.22 to 20.18)	187.73(103.23 to 313.89)	35.40(19.54 to 58.77)	4.24(3.81 to 4.66)
Lithuania	1338.69(1160.04 to 1549.51)	231.16(200.28 to 267.16)	2672.62(2221.99 to 3164.03)	345.86(287.04 to 410.42)	1.17(0.97 to 1.37)
Luxembourg	367.8(315.91 to 426.56)	511.17(438.75 to 592.68)	360.38(298.95 to 426.51)	258.26(214.32 to 306.05)	-2.78(-3.02 to -2.54)
Madagascar	1914.66(858.27 to 3569.40)	349.83(156.32 to 653.05)	2913.66(1300.01 to 5224.84)	282.62(125.16 to 510.32)	-0.87(-1.06 to -0.67)
Malawi	696.1(296.78 to 1412.06)	172.92(74.06 to 350.91)	1630.57(727.29 to 2997.87)	211.96(95.78 to 389.24)	0.43(0.29 to 0.56)
Malaysia	3964.53(2665.55 to 5558.46)	401.76(270.50 to 563.58)	14525.18(10179.43 to 20665.67)	458.89(320.22 to 653.91)	0.03(-0.27 to 0.33)
Maldives	6.09(3.73 to 9.71)	74.65(45.37 to 119.68)	20.53(9.52 to 37.61)	63.06(30.09 to 113.88)	-1.10(-1.28 to -0.92)
Mali	592.42(275.62 to 1264.66)	144.78(66.95 to 307.49)	1246.09(497.41 to 2617.05)	138.26(55.22 to 291.06)	-0.16(-0.37 to 0.05)
Malta	174.94(147.90 to 204.69)	320.8(271.10 to 375.02)	210.71(172.48 to 253.20)	151.54(124.15 to 182.40)	-3.03(-3.40 to -2.66)
Marshall Islands	5.12(2.98 to 8.41)	323.41(187.58 to 532.25)	9.10(5.34 to 14.25)	294.2(174.91 to 453.84)	-0.45(-0.49 to -0.42)
Mauritania	362.72(164.82 to 624.04)	320.05(144.43 to 551.57)	649.25(232.92 to 1312.22)	274.36(98.24 to 554.72)	-0.93(-1.13 to -0.72)
Mauritius	133.43(115.28 to 153.46)	169.12(145.61 to 194.4)	214.93(180.83 to 250.66)	95.58(80.41 to 111.38)	-1.70(-2.13 to -1.28)
Mexico	3935.81(3734.79 to 4149.61)	86.29(81.59 to 91.14)	10510.76(9113.41 to 12026.74)	70.07(60.81 to 80.08)	-1.05(-1.23 to -0.87)
Micronesia (Federated States of)	20.74(12.69 to 32.7)	414.69(253.34 to 656.05)	24.22(15.20 to 36.86)	350.59(221.78 to 528.79)	-0.72(-0.82 to -0.63)
Monaco	65.23(42.92 to 93.94)	646.34(424.29 to 932.10)	80.16(51.66 to 119.85)	567.14(365.19 to 847.25)	-0.40(-0.56 to -0.25)
Mongolia	42.88(28.70 to 61.30)	35.73(23.84 to 51.26)	178.10(130.02 to 234.86)	77.14(56.17 to 102.33)	2.69(2.32 to 3.06)
Montenegro	561.36(409.89 to 763.70)	743.28(541.67 to 1014.90)	1268.79(878.30 to 1793.47)	989.12(685.87 to 1397.55)	1.18(1.04 to 1.31)
Morocco	219.78(125.82 to 351.43)	13.39(7.56 to 21.63)	1939.56(1209.84 to 2877.53)	48.31(30.08 to 71.93)	4.91(4.65 to 5.16)
Mozambique	1317.57(521.96 to 2792.28)	216.14(86.86 to 452.01)	3091.57(1172.64 to 6378.79)	276.68(107.52 to 564.74)	0.94(0.87 to 1.01)
Myanmar	2198.00(1183.32 to 3659.83)	91.06(49.67 to 149.95)	5550.27(3558.11 to 8205.74)	106.2(68.11 to 157.20)	0.42(0.38 to 0.46)
Namibia	188.68(109.91 to 310.74)	284.98(165.41 to 469.62)	372.01(230.61 to 578.53)	271.65(168.47 to 422.17)	-0.41(-0.56 to -0.25)
Nauru	2.52(1.56 to 3.92)	558.96(349.91 to 863.34)	3.15(1.66 to 5.28)	623.03(297.98 to 1094.15)	0.31(0.20 to 0.43)
Nepal	707.30(340.79 to 1361.47)	75.33(36.78 to 143.76)	3537.22(2063.64 to 6000.17)	135.27(78.91 to 228.83)	2.12(1.93 to 2.31)
Netherlands	24381.47(20900.4 to 28220.74)	919.29(787.18 to 1064.35)	19878.80(16539.44 to 23100.06)	401.31(334.37 to 466.42)	-3.35(-3.75 to -2.95)
New Zealand	6485.84(5645.20 to 7353.18)	1242.18(1078.73 to 1408.82)	5094.39(4319.21 to 5838.54)	443.19(377.08 to 507.07)	-3.87(-4.07 to -3.68)
Nicaragua	66.85(47.65 to 91.13)	39.42(28.03 to 53.76)	229.20(159.27 to 324.91)	40.66(28.27 to 57.55)	0.08(-0.16 to 0.32)
Niger	420.77(167.13 to 960.89)	158.22(63.2 to 359.43)	1106.59(390.81 to 2710.32)	135.93(48.11 to 331.35)	-0.67(-0.80 to -0.55)
Nigeria	13964.06(7007.82 to 25893.44)	297.47(150.08 to 548.04)	22484.51(10338.41 to 40810.95)	257.63(120.21 to 462.67)	-0.81(-0.99 to -0.63)
Niue	1.13(0.74 to 1.64)	379.05(247.86 to 552.72)	0.89(0.58 to 1.29)	336.98(220.35 to 488.44)	-0.61(-0.69 to -0.54)
North Macedonia	485.16(349.74 to 663.11)	225.61(161.97 to 309.10)	1287.43(765.77 to 2029.27)	307.64(186.64 to 476.44)	0.75(0.55 to 0.95)
Northern Mariana Islands	6.57(4.40 to 9.43)	563.92(374.48 to 811.02)	17.81(10.54 to 28.32)	345.72(205.90 to 545.85)	-2.49(-2.78 to -2.20)
Norway	9208.21(8520.72 to 9773.41)	959.15(888.43 to 1017.82)	7598.95(6684.07 to 8264.48)	543.71(481.44 to 589.99)	-2.41(-2.71 to -2.11)
Oman	13.44(7.11 to 23.76)	19.26(10.30 to 33.75)	125.35(59.94 to 247.28)	66.01(32.69 to 125.80)	4.67(4.23 to 5.12)
Pakistan	6319.92(4008.24 to 9987.86)	99.31(62.63 to 157.03)	20412.23(13864.24 to 29328.15)	168.6(113.98 to 242.35)	1.49(1.21 to 1.77)
Palau	3.5(2.32 to 5.06)	338.29(221.15 to 494.76)	6.35(4.06 to 9.71)	287.68(183.55 to 440.45)	-0.60(-0.63 to -0.57)
Palestine	68.65(42.51 to 106.72)	69.13(42.58 to 107.65)	228.58(151.14 to 332.17)	87.16(57.33 to 128.40)	0.81(0.70 to 0.91)
Panama	482.12(402.64 to 567.15)	274.10(228.83 to 322.28)	1122.13(829.34 to 1419.30)	203.90(150.74 to 257.99)	-1.48(-1.71 to -1.25)
Papua New Guinea	270.97(145.68 to 470.07)	158.76(83.88 to 273.00)	724.43(412.53 to 1177.49)	161.80(93.21 to 262.00)	-0.07(-0.16 to 0.02)
Paraguay	615.05(440.84 to 845.92)	235.64(168.94 to 324.00)	2368.85(1617.69 to 3320.36)	339.44(232.03 to 475.11)	1.27(1.16 to 1.38)
Peru	1152.75(759.28 to 1695.03)	85.92(56.67 to 126.21)	2909.79(1864.06 to 4371.17)	71.72(45.96 to 107.69)	-0.73(-0.90 to -0.57)
Philippines	3768.07(3086.72 to 4519.33)	130.70(105.38 to 158.47)	13066.28(10514.72 to 15741.42)	150.50(121.48 to 180.47)	0.44(0.38 to 0.51)
Poland	30127.54(28747.84 to 31382.07)	534.99(509.01 to 557.71)	39844.19(35317.92 to 44288.36)	403.09(357.58 to 448.26)	-1.45(-1.66 to -1.25)
Portugal	3650.65(3126.58 to 4217.78)	198.68(170.11 to 229.20)	5887.31(4921.56 to 6908.40)	176.98(148.58 to 207.76)	-0.78(-0.97 to -0.59)
Puerto Rico	1206.46(1033.38 to 1397.69)	264.42(226.56 to 306.03)	1068.27(844.84 to 1323.33)	103.47(82.07 to 128.27)	-3.76(-4.01 to -3.51)
Qatar	13.06(8.56 to 19.08)	176.04(116.69 to 255.46)	74.01(34.86 to 148.96)	112.65(59.02 to 209.83)	-1.61(-2.17 to -1.04)
Republic of Korea	5895.08(3555.05 to 9082.65)	203.25(123.74 to 310.30)	23892.79(16895.30 to 31863.28)	198.81(140.33 to 265.23)	-0.18(-0.42 to 0.06)
Republic of Moldova	543.2(465.33 to 632.89)	101.84(87.32 to 118.15)	1397.22(1179.95 to 1645.23)	174.17(147.20 to 204.87)	1.65(1.24 to 2.05)
Romania	4917.96(4283.84 to 5645.43)	142.12(123.77 to 163.03)	10660.01(8879.62 to 12706.14)	211.31(175.87 to 251.86)	0.97(0.80 to 1.14)
Russian Federation	66638.6(64069.18 to 68822.83)	289.5(277.32 to 299.31)	158237.42(141998.44 to 174134.56)	486.67(437.24 to 534.72)	1.43(0.95 to 1.91)
Rwanda	939.83(487.77 to 1617.81)	317.01(166.55 to 545.33)	1347.35(728.34 to 2422.36)	210.69(114.64 to 379.43)	-2.02(-2.39 to -1.66)
Saint Kitts and Nevis	23.16(19.73 to 27.04)	432.92(368.69 to 504.25)	22.64(17.51 to 29.85)	296.99(232.24 to 385.76)	-1.45(-1.69 to -1.20)
Saint Lucia	118.53(100.05 to 139.25)	1137.92(958.8 to 1342.86)	158.22(124.86 to 196.00)	541.34(427.47 to 669.81)	-3.27(-3.61 to -2.93)
Saint Vincent and the Grenadines	27.53(23.34 to 32.21)	300.58(255.19 to 350.99)	41.22(33.97 to 49.52)	235.42(194.53 to 281.97)	-1.39(-1.69 to -1.10)
Samoa	31.77(18.78 to 48.48)	353.80(208.12 to 539.96)	45.12(29.41 to 66.28)	290.30(187.56 to 428.56)	-0.78(-0.88 to -0.68)
San Marino	17.25(11.49 to 25.33)	361.99(240.54 to 532.79)	20.25(10.91 to 34.06)	197.02(104.79 to 333.24)	-0.95(-1.32 to -0.58)
Sao Tome and Principe	15.08(6.55 to 29.38)	201.88(86.42 to 397.33)	29.08(13.36 to 55.41)	259.75(118.63 to 495.75)	0.85(0.75 to 0.95)
Saudi Arabia	48.27(29.72 to 75.13)	8.30(5.13 to 12.85)	344.61(223.34 to 524.19)	21.64(13.92 to 33.47)	3.82(3.40 to 4.24)
Senegal	899.55(386.81 to 1803.93)	252.37(108.64 to 508.83)	2048.48(813.65 to 4067.67)	246.77(97.82 to 490.44)	-0.40(-0.53 to -0.26)
Serbia	5944.09(4307.23 to 7943.36)	466.87(339.54 to 624.13)	10937.30(7681.06 to 15080.48)	480.68(337.60 to 663.40)	0.14(0.06 to 0.21)
Seychelles	8.57(5.96 to 12.12)	119.01(82.70 to 168.41)	14.79(8.45 to 24.26)	115.84(66.73 to 188.92)	0.00(-0.19 to 0.20)
Sierra Leone	604.03(262.74 to 1211.76)	253.54(110.63 to 508.36)	870.67(342.99 to 1818.07)	219.83(86.91 to 457.39)	-0.66(-0.76 to -0.56)
Singapore	796.75(689.76 to 913.26)	323.58(279.60 to 370.80)	2517.13(2121.24 to 2905.64)	237.21(199.50 to 274.16)	-0.90(-1.09 to -0.71)
Slovakia	2016.38(1537.46 to 2666.51)	257.06(195.99 to 338.91)	3376.82(2357.62 to 4709.58)	262.06(183.03 to 365.37)	-0.02(-0.12 to 0.09)
Slovenia	970.0(837.02 to 1108.43)	309.05(266.61 to 353.07)	1553.34(1246.84 to 1934.12)	254.82(204.78 to 317.16)	-0.92(-1.25 to -0.59)
Solomon Islands	21.97(12.06 to 39.98)	186.35(103.53 to 329.35)	59.22(34.48 to 96.75)	199.31(114.08 to 328.6)	0.10(-0.03 to 0.22)
Somalia	293.6(134.53 to 640.19)	147.60(67.51 to 321.02)	571.44(246.95 to 1407.98)	100.14(43.32 to 243.81)	-1.43(-1.56 to -1.30)
South Africa	7108.84(5145.24 to 9293.47)	316.71(228.78 to 414.16)	12302.28(10355.20 to 14543.15)	240.92(202.88 to 284.36)	-1.63(-2.03 to -1.23)
South Sudan	689.74(247.13 to 1403.14)	232.23(85.82 to 467.83)	581.81(228.96 to 1158.15)	160.94(64.14 to 319.29)	-1.52(-1.74 to -1.29)
Spain	21716.0(18288.67 to 25592.51)	297.17(250.39 to 349.77)	32236.52(26321.80 to 38170.33)	248.1(203.50 to 294.01)	-1.31(-1.62 to -0.99)
Sri Lanka	404.4(285.65 to 556.68)	37.25(26.34 to 50.97)	1282.22(782.52 to 1977.99)	39.63(24.45 to 60.63)	0.65(0.44 to 0.87)
Sudan	112.41(52.85 to 278.58)	10.54(5.00 to 25.81)	737.16(419.32 to 1183.15)	36.11(20.70 to 57.69)	4.66(4.39 to 4.92)
Suriname	82.93(58.23 to 116.14)	289.45(203.18 to 404.79)	183.19(112.27 to 282.63)	241.76(148.19 to 372.93)	-0.66(-0.84 to -0.47)
Sweden	18939.64(16651.40 to 21212.55)	899.14(790.89 to 1006.87)	13553.56(11226.58 to 15766.06)	435.56(362.50 to 507.03)	-2.83(-3.15 to -2.50)
Switzerland	8193.06(6889.82 to 9608.89)	589.51(495.60 to 692.41)	6547.56(5292.37 to 7663.34)	255.94(207.96 to 299.95)	-2.79(-2.95 to -2.62)
Syrian Arab Republic	219.98(137.75 to 335.17)	37.98(23.84 to 57.66)	699.70(446.00 to 1049.05)	46.10(29.35 to 69.04)	0.48(0.37 to 0.59)
Taiwan (Province of China)	2694.0(2309.17 to 3130.7)	142.26(121.90 to 164.95)	12962.95(10861.82 to 15209.33)	230.92(193.82 to 270.72)	0.60(-0.08 to 1.29)
Tajikistan	95.83(60.05 to 147.33)	30.66(19.07 to 47.21)	168.53(107.43 to 253.32)	28.72(18.40 to 43.32)	-0.29(-0.60 to 0.02)
Thailand	6866.86(4423.75 to 10316.00)	205.87(132.86 to 308.44)	28272.39(18919.94 to 40038.15)	206.39(138.32 to 291.90)	-0.41(-0.55 to -0.27)
Timor-Leste	14.06(8.89 to 22.79)	61.93(38.82 to 100.05)	79.62(46.79 to 130.45)	82.29(47.89 to 134.64)	1.02(0.92 to 1.12)
Togo	346.97(151.97 to 688.46)	279.67(122.57 to 554.74)	990.03(388.25 to 1993.97)	268.27(105.77 to 538.44)	-0.50(-0.64 to -0.36)
Tokelau	0.62(0.38 to 0.94)	358.49(222.1 to 543.92)	0.67(0.35 to 1.14)	348.44(183.30 to 589.12)	-0.36(-0.47 to -0.25)
Tonga	18.66(12.17 to 27.50)	310.49(201.44 to 461.85)	31.10(18.79 to 48.04)	328.77(198.65 to 508.24)	0.04(-0.15 to 0.23)
Trinidad and Tobago	638.59(544.62 to 746.66)	640.49(543.00 to 749.29)	1138.39(840.76 to 1502.41)	456.79(338.49 to 600.81)	-1.67(-1.99 to -1.35)
Tunisia	93.63(56.98 to 142.23)	16.21(9.82 to 24.73)	756.20(445.20 to 1218.65)	47.32(27.64 to 76.74)	3.95(3.64 to 4.26)
Turkey	9032.61(5602.02 to 13984.27)	226.11(140.99 to 347.83)	29558.31(20637.26 to 41934.18)	253.26(176.85 to 358.34)	0.34(0.15 to 0.53)
Turkmenistan	245.88(198.84 to 303.65)	112.69(90.74 to 139.74)	934.52(689.07 to 1340.98)	207.00(153.56 to 295.81)	1.87(1.70 to 2.04)
Tuvalu	2.20(1.30 to 3.53)	321.46(188.72 to 518.14)	3.44(2.33 to 4.88)	300.30(200.94 to 430.74)	-0.39(-0.46 to -0.32)
Uganda	1259.95(533.39 to 2573.31)	182.3(78.82 to 370.14)	2680.69(1209.41 to 4923.98)	183.50(84.31 to 336.34)	-0.33(-0.47 to -0.19)
Ukraine	22335.41(19077.42 to 26264.46)	233.44(198.89 to 274.99)	27367.44(19958.72 to 36383.18)	258.25(188.33 to 343.17)	0.03(-0.24 to 0.29)
United Arab Emirates	51.63(27.36 to 85.35)	153.15(83.08 to 250.46)	412.29(285.31 to 589.16)	182.75(123.41 to 260.99)	2.72(1.93 to 3.51)
United Kingdom	151236.75(143935.73 to 156090.74)	1207.04(1147.91 to 1246.54)	81255.91(72856.83 to 86276.49)	437.86(395.68 to 463.85)	-3.92(-4.29 to -3.55)
United Republic of Tanzania	3091.49(1640.59 to 5565.49)	263.55(140.74 to 473.96)	7731.59(3403.97 to 14918.39)	291.94(129.8 to 560.89)	-0.07(-0.24 to 0.09)
United States of America	271479.68(251706.43 to 284380.00)	628.6(582.96 to 658.43)	166769.65(149723.52 to 177979.77)	208.89(188.08 to 222.73)	-4.29(-4.57 to -4.01)
United States Virgin Islands	34.59(24.03 to 47.23)	382.74(264.77 to 526.53)	54.29(35.33 to 79.15)	218.39(141.93 to 321.37)	-2.06(-2.30 to -1.82)
Uruguay	3531.78(3003.62 to 4107.10)	680.65(578.62 to 791.61)	3726.58(3137.30 to 4338.73)	504.38(425.12 to 587.93)	-1.38(-1.65 to -1.11)
Uzbekistan	306.75(223.14 to 442.16)	22.81(16.55 to 33.06)	3238.03(2557.62 to 4029.96)	118.85(94.04 to 148.09)	6.06(5.32 to 6.82)
Vanuatu	13.81(7.79 to 23.07)	231.88(130.28 to 384.38)	35.73(21.76 to 54.96)	219.69(133.76 to 341.24)	-0.37(-0.47 to -0.26)
Venezuela (Bolivarian Republic of)	3000.18(2577.41 to 3493.13)	274.64(235.55 to 319.91)	7937.80(5905.23 to 10362.31)	218.66(163.55 to 284.38)	-1.37(-1.69 to -1.04)
Viet Nam	3406.03(2115.47 to 5308.50)	74.23(45.96 to 115.55)	12800.63(7970.12 to 19573.50)	119.79(74.75 to 183.29)	1.67(1.60 to 1.75)
Yemen	59.01(28.24 to 111.03)	10.88(5.35 to 20.08)	544.10(284.63 to 935.50)	36.20(19.11 to 61.79)	4.55(4.18 to 4.93)
Zambia	732.93(406.14 to 1266.21)	260.04(143.38 to 447.57)	2607.05(1057.86 to 4886.98)	388.62(162.89 to 719.02)	1.37(0.96 to 1.78)
Zimbabwe	1548.24(1051.72 to 2208.82)	377.74(256.38 to 542.83)	2948.20(1888.54 to 4292.22)	439.72(281.32 to 638.89)	0.40(0.24 to 0.57)
