# Supplementary material for: Global burden of aortic aneurysm in adults aged 60 and older from 1990 to 2021 and projections to 2040: based on the Global Burden of Disease Study 2021
Source: Research Square preprint supplement (doi:10.21203/rs.3.rs-7393211/v1), 2025-10-01
Supplement: Supplementary file 4 [file 80ce199ea41da9ef4c611bb0.docx]

Fig.S1 Temporal trends of ASMR among different age groups from 1990 to 2040.





Fig.S2 Temporal trends of ASDR among different age groups from 1990 to 2040.
