# Supplementary material for: Global burden of aortic aneurysm in adults aged 60 and older from 1990 to 2021 and projections to 2040: based on the Global Burden of Disease Study 2021
Source: Research Square preprint supplement (doi:10.21203/rs.3.rs-7393211/v1), 2025-10-01
Supplement: Supplementary file 5 [file 91818c436e74d50b2276d40c.xlsx]

## Sheet: Sheet1
The ASMR and ASDR among different age groups of males and females between 1990 and 2021
Sex	Age (years)	ASMR per 100,000 (95% UI)		ASDR per 100,000 (95% UI)
		1990	2021	1990	2021
Male	60-64 years	7.42(6.89 to 8.23)	5.37(5.01 to 5.90)	214.08(198.70 to 237.49)	154.97(144.59 to 170.49)
	65-69 years	14.58(13.62 to 15.90)	8.67(8.04 to 9.57)	354.49(331.28 to 386.78)	210.86(195.68 to 232.85)
	70-74 years	24.51(23.06 to 26.42)	14.32(13.43 to 15.78)	490.03(461.13 to 528.41)	286.35(268.58 to 315.69)
	75-79 years	42.66(40.32 to 45.43)	22.24(20.60 to 24.35)	680.79(643.40 to 725.19)	354.93(328.63 to 388.76)
	80-84 years	59.58(55.01 to 63.28)	34.72(30.99 to 37.91)	746.33(689.06 to 792.85)	433.17(386.57 to 473.16)
	85-89 years	81.17(72.79 to 86.82)	57.94(50.41 to 62.44)	807.67(724.32 to 863.93)	573.29(498.77 to 617.92)
	90-94 years	106.36(92.21 to 114.77)	89.29(75.27 to 97.35)	917.03(795.04 to 989.54)	769.22(648.53 to 838.67)
	95+ years	112.55(90.71 to 123.55)	100.5(76.52 to 112.24)	916.75(739.31 to 1006.13)	800.89(610.56 to 894.13)
Female	60-64 years	2.38(2.15 to 2.79)	2.02(1.83 to 2.30)	68.67(61.82 to 80.52)	58.31(52.75 to 66.30)
	65-69 years	4.73(4.33 to 5.35)	3.51(3.20 to 3.86)	114.93(105.23 to 129.89)	85.33(77.77 to 93.82)
	70-74 years	8.74(8.00 to 9.79)	6.59(5.92 to 7.36)	174.25(159.48 to 195.31)	131.49(118.19 to 146.97)
	75-79 years	16.10(14.76 to 17.54)	11.39(10.08 to 12.44)	255.96(234.56 to 278.89)	180.97(160.22 to 197.69)
	80-84 years	25.15(22.10 to 27.18)	19.30(16.14 to 21.35)	313.26(275.26 to 338.66)	239.67(200.44 to 265.13)
	85-89 years	40.62(33.83 to 44.27)	34.09(26.06 to 38.92)	401.91(334.76 to 438.10)	335.65(256.75 to 383.15)
	90-94 years	61.09(48.27 to 67.31)	57.91(41.84 to 66.94)	526.25(415.85 to 579.82)	498.36(360.07 to 576.02)
	95+ years	76.76(57.19 to 86.73)	89.24(60.11 to 105.9)	623.08(464.52 to 703.85)	708.03(477.95 to 839.35)
